# Supplementary material for: Effect of oxindolimine copper(ii) and zinc(ii) complexes on human topoisomerase I activity
Source: Royal Society of Chemistry journal article supplement (doi:10.1039/c3mt00099k), 2013-10-30
Supplement: c3mt00099k.pdf [file c3mt00099k.pdf]

### Supplementary data

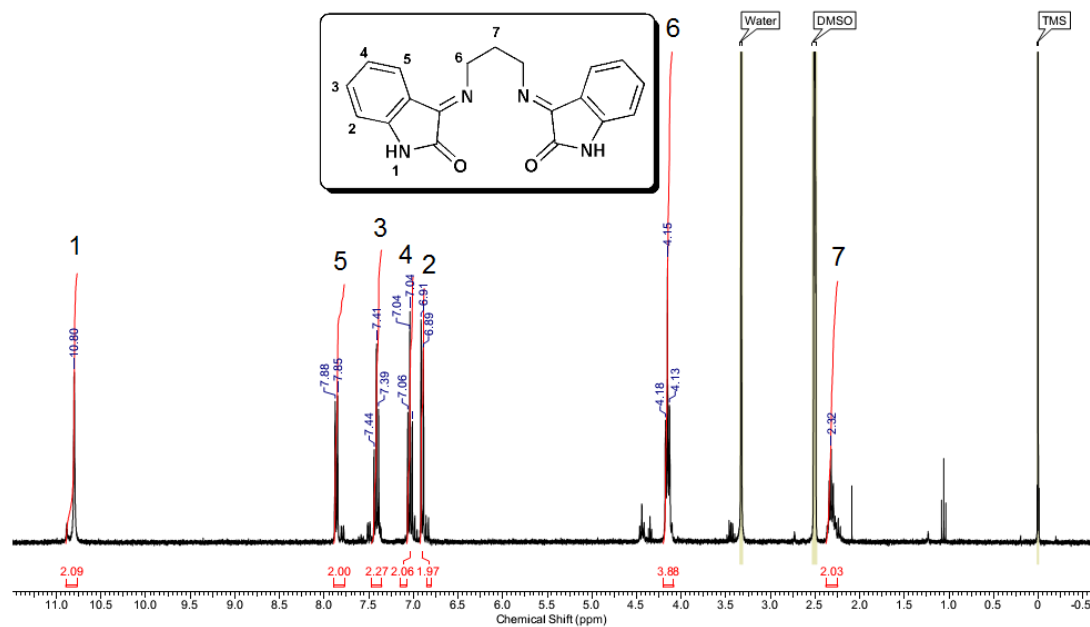

**Figure S-1:** <sup>1</sup>H NMR spectrum of the ligand *isapn*, in dms0-d6.

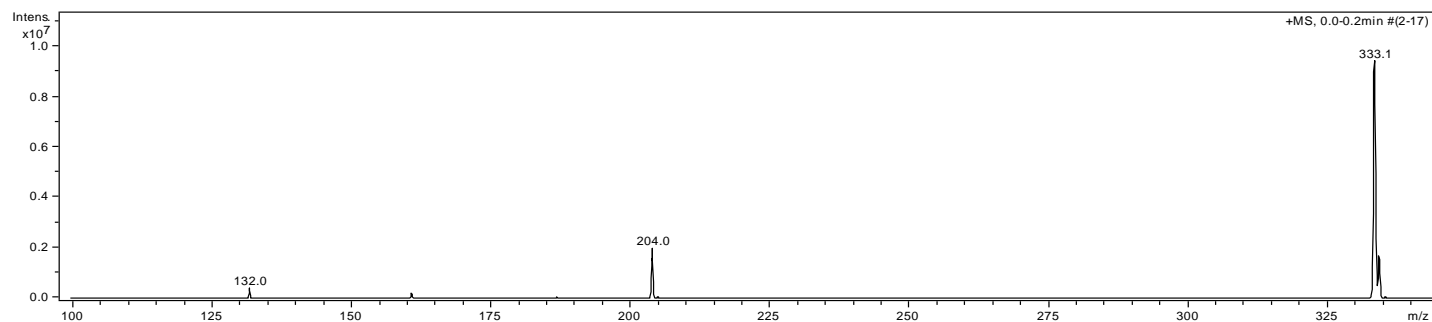

**Figure S-2:** Mass spectrum of the ligand *isapn*, in methanol.

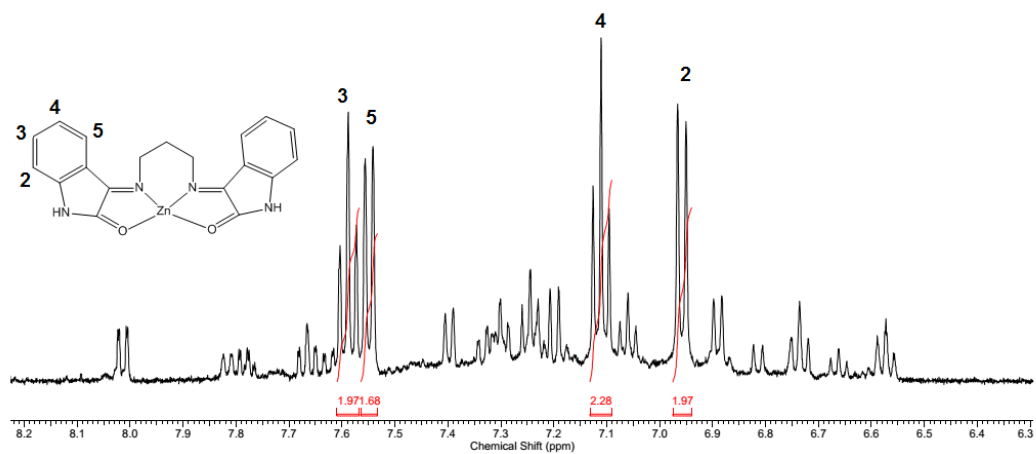

**Figure S-3:**  $^1\text{H}$  NMR spectrum of the complex  $[\text{Zn}(\text{isapn})]\text{ClO}_4$ , in  $\text{MeOH-d}_4$ , at apparent pH 5.

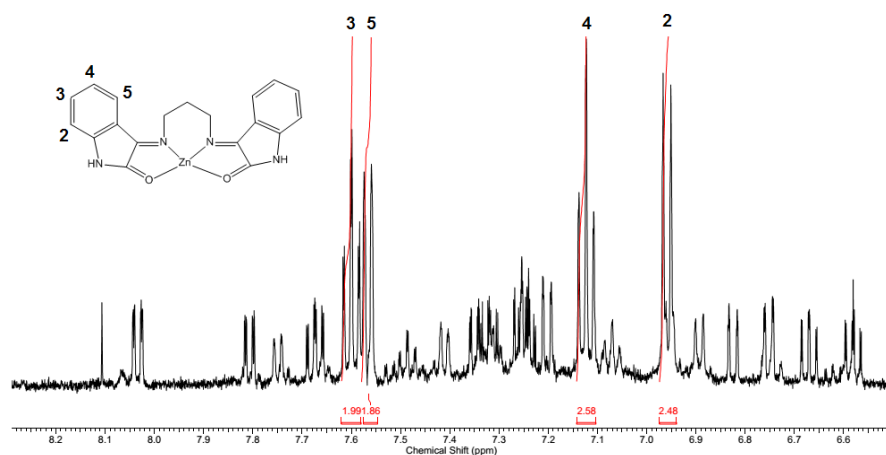

**Figure S-4:**  $^1\text{H}$  NMR spectrum of the complex  $[\text{Zn}(\text{isapn})]\text{ClO}_4$ , in  $\text{MeOH-d}_4$ , at apparent pH 7.

In both spectra, the keto-keto species (**A**) is predominant. However, with increasing pH the intensity of these characteristic signals decrease, and there are other signals that can be attributed to the keto-enol species (**B**) or enol-enol species (**C**). The complex was isolated as species **B**, but all the species are probably present in solution at different ratio, according to the equilibria:

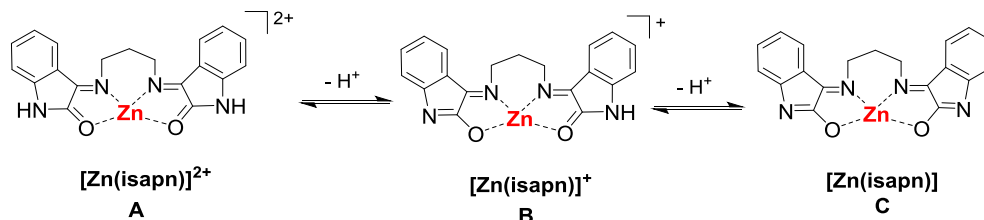

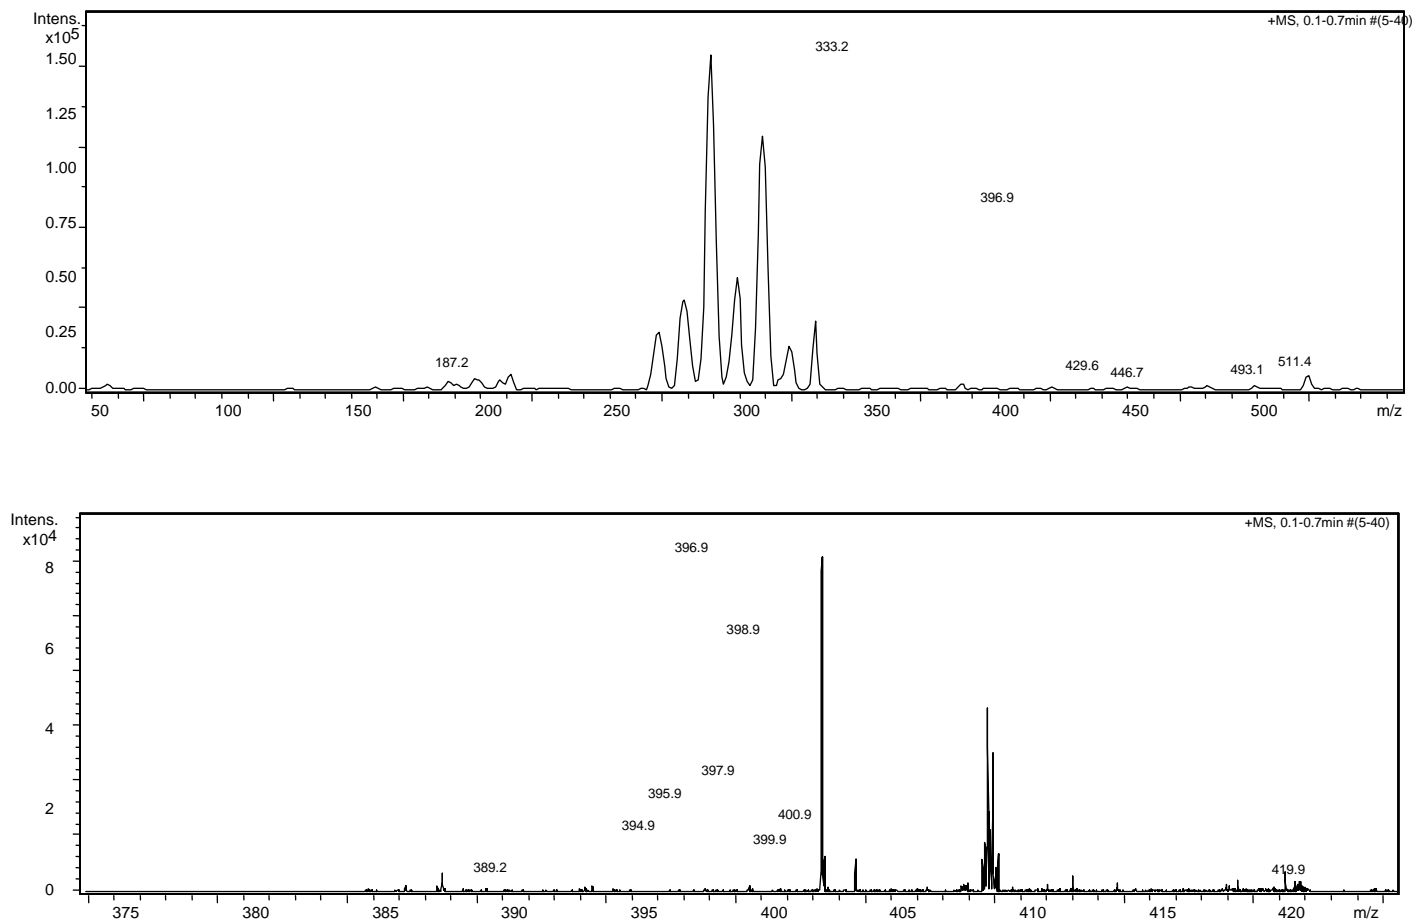

**Figure S-5:** Mass spectrum of the complex  $[\text{Zn}(\text{isapn})]\text{ClO}_4$  dissolved in methanol/water (9:1)

Figure S-5 shows the positive ion electrospray mass spectrum of the isatin-schiff base zinc(II) complex acquired from a 9:1 methanol/water solution, and reveals a metal/ligand ratio of 1:1.

Zinc displays five isotopes and the two more abundant were observed in a 1:0.56 ratio for  $^{64}\text{Zn}$  (48.6%) and  $^{66}\text{Zn}$  (27.4%).

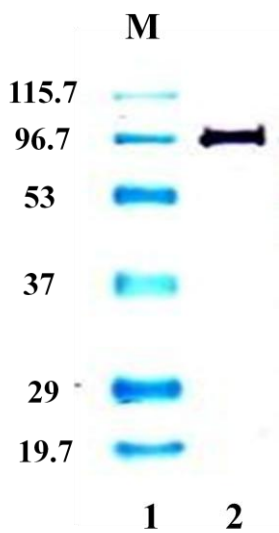

**Figure S-6:** Western blot analysis of the purified human topo IB fraction detected by reaction with monoclonal antibody. Lane 1, markers of different molecular weights in kDa:  $\beta$ -galactosidase (115.7), Bovine serum albumin (96.7), Ovalbumin (53), Soybean trypsin inhibitor (37), Carbonic anhydrase (29), Lysozyme (19.7). Lane 2, purified human topoisomerase I band.

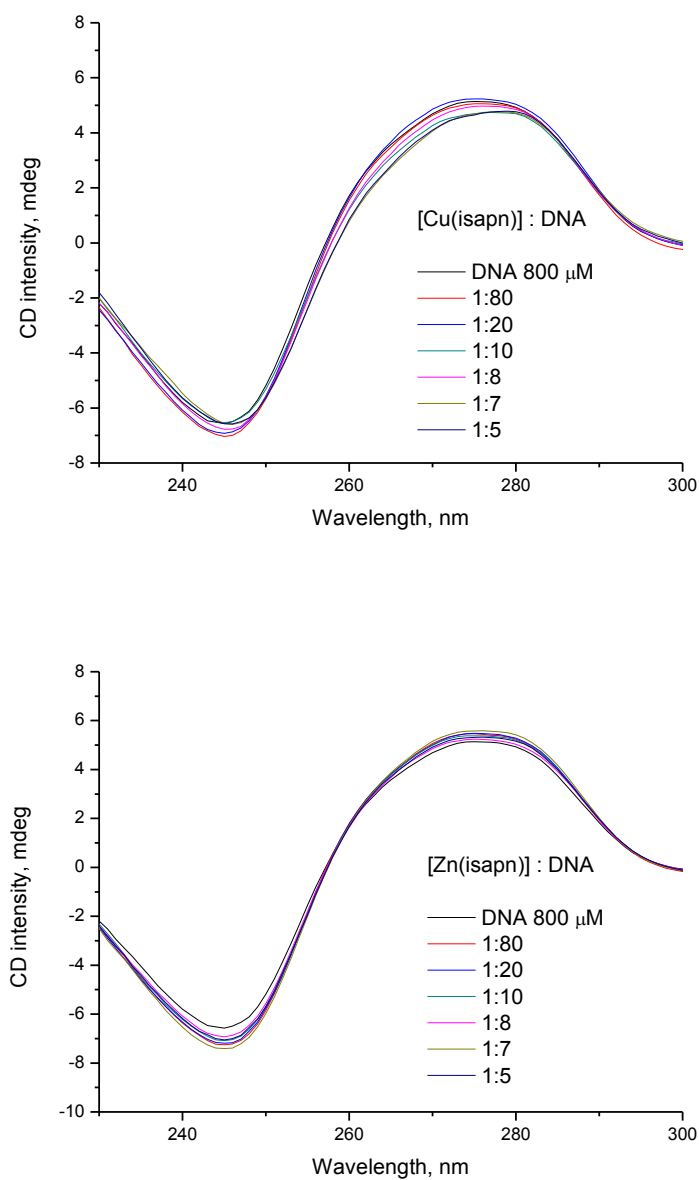

**Figure S-7:** CD spectra of CT-DNA (800 μM) in phosphate buffer 50 mM/NaCl 0.1 M, in the absence and presence of the complexes [Cu(isapn)]<sup>2+</sup> and [Zn(isapn)]<sup>+</sup> at different concentrations (up to 160 μM).
